# Supplementary material for: Direct Evidence of Dynamic Metal Support Interactions in Co/TiO2 Catalysts by Near-Ambient Pressure X-ray Photoelectron Spectroscopy
Source: MDPI journal article supplement (doi:10.3390/nano13192672), 2023-09-29
Supplement: s1 [file s1]

- 1 European Synchrotron Radiation Facility, CS 40220, CEDEX 9, 38043 Grenoble, France; [davide.salusso@esrf.fr](mailto:davide.salusso@esrf.fr)
- 2 Centre RAPSODEE UMR CNRS 5302, IMT Mines Albi, Université de Toulouse, Campus Jarlard, CEDEX 09, 81013 Albi, France; [canio2sca@gmail.com](mailto:canio2sca@gmail.com) (C.S.); [doan.phamminh@mines-albi.fr](mailto:doan.phamminh@mines-albi.fr) (D.P.M.)
- 3 Laboratoire de Physique et Chimie des Nano-objets (LPCNO), Université de Toulouse, INSA, UPS, CNRS, LPCNO, 135 Avenue de Rangueil, 31077 Toulouse, France; [ksoulant@insa-toulouse.fr](mailto:ksoulant@insa-toulouse.fr)
- 4 LCC, CNRS-UPR 8241, ENSIACET, Université de Toulouse, 31030 Toulouse, France; [philippe.serp@ensiacet.fr](mailto:philippe.serp@ensiacet.fr)
- 5 Interface Design, Helmholtz-Zentrum Berlin für Materialien und Energie GmbH (HZB), Albert-Einstein-Str. 15, 12489 Berlin, Germany; [anna.efimenko@helmholtz-berlin.de](mailto:anna.efimenko@helmholtz-berlin.de)
- 6 Energy Materials In-Situ Laboratory Berlin (EMIL), Helmholtz-Zentrum Berlin für Materialien und Energie GmbH (HZB), Albert-Einstein-Str. 15, 12489 Berlin, Germany
- 7 Institut de Chimie et Procédés Pour l'Energie, l'Environnement et la Santé (ICPEES), ECPM, UMR 7515 CNRS—Université de Strasbourg, 25 Rue Becquerel, CEDEX 02, 67087 Strasbourg, France

\* Correspondence: [spiros.zafeiratos@unistra.fr](mailto:spiros.zafeiratos@unistra.fr)

**TiO<sub>2</sub>-P25**



**m-TiO<sub>2</sub>**



| Support            | BET surface area<br>(m <sup>2</sup> ·g <sup>-1</sup> ) | ICP-OES (%wt) |      | Crystallite size <sup>a)</sup> (nm) |                    | % r-TiO <sub>2</sub> <sup>a)</sup> |
|--------------------|--------------------------------------------------------|---------------|------|-------------------------------------|--------------------|------------------------------------|
|                    |                                                        | Na            | B    | a-TiO <sub>2</sub>                  | r-TiO <sub>2</sub> |                                    |
| TiO <sub>2</sub>   | 59                                                     | -             | -    | 25                                  | 44                 | 14.4                               |
| m-TiO <sub>2</sub> | 60                                                     | 0.52          | 0.02 | 25                                  | 37                 | 10.6                               |

1

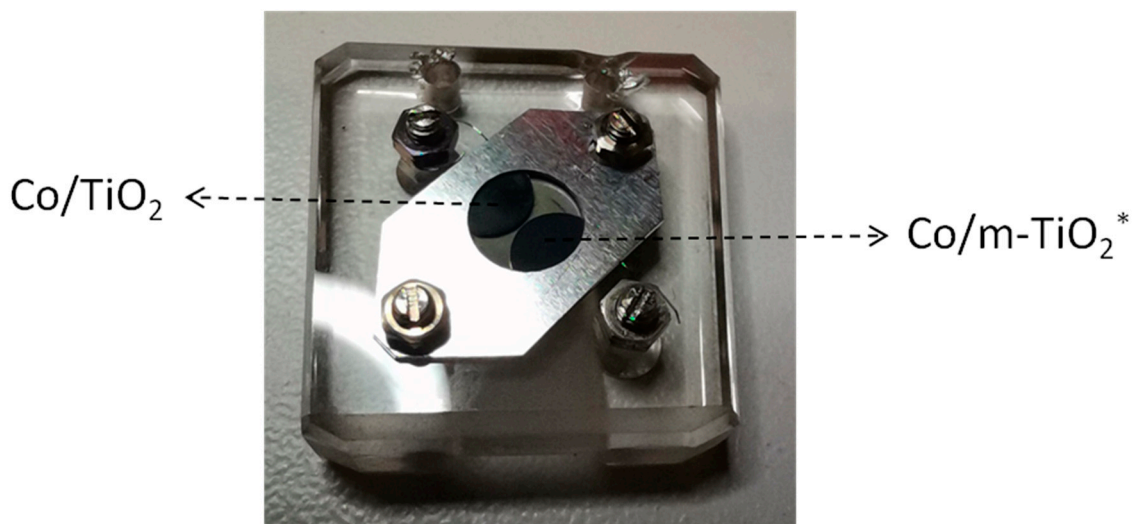

**Figure S1.** Photograph of the sample holder with the two catalysts mounted on it

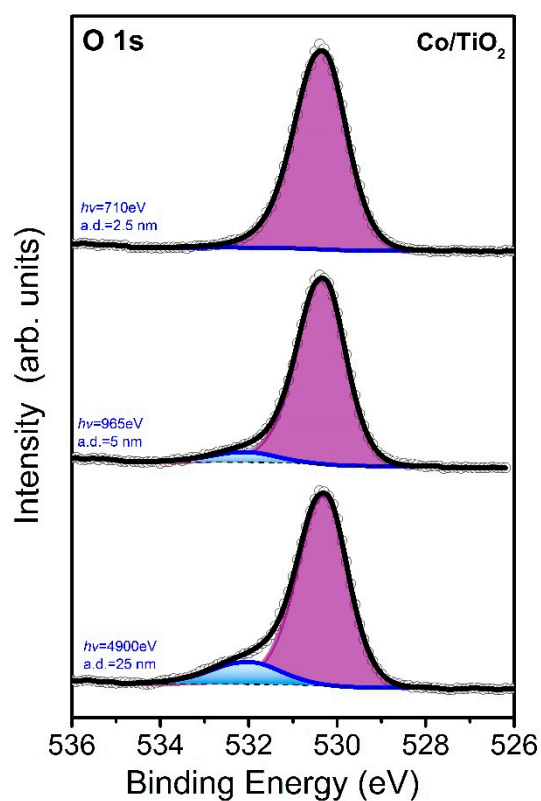

**Figure S2.** The O 1s spectra of Co/TiO<sub>2</sub> catalysts measured in 2.5 mbar CO<sub>2</sub>:H<sub>2</sub> at 350 °C with 3 different excitation photon energies corresponding to 3 different analysis depths (a.d) (indicated in blue). Spectra are normalized to the same height to facilitate peak shape comparison.

#### Relation between photon energy and analysis depth in photoemission measurements.

The surface sensitivity of X-ray photoelectron spectroscopy is caused by the attenuation of low-energy photoelectrons due to inelastic scattering as they leave the solid sample. This attenuation is determined by the inelastic mean free path (IMFP or  $\lambda$ ), which is the average distance an electron may travel through a material without losing energy due to inelastic scattering. In a first approximation, the Beer-Lambert

law describes the intensity  $I_d$  of a photoelectron signal (i.e. the XPS peak area) coming from an analysis depth  $d$ :

$$I_d = I_{d=0} \exp(-d/\lambda \cos\theta) \quad (1)$$

where  $I_{d=0}$  is the intensity from a depth  $d=0$ ,  $\theta$  is the angle between the surface normal and the analyser direction (in our experiment  $\theta=0$ , so  $\cos\theta=1$ ), and  $\lambda$  is the IMFP. According to equation (1), 95% of electrons come from a depth within  $3\lambda$  of the surface, therefore typically the analysis depth is approximated as  $3\lambda$ .

The IMFP is only weakly material dependent, but rather strongly dependent on the photoelectron kinetic energy. The most common approach for calculating the IMFP as a function of electron kinetic energy ( $E_k$ ) is the TPP-2M formula [1]. To better understand the correlation between  $E_k$  and  $\lambda$  one can use the simplified approximate formula given by Seah and Dench [2] :

$$\lambda = c E_k^x \quad (2)$$

where  $c$  is a constant and  $x$  usually varies between 0.4 and 0.9 depending of the material.

For a specific core level with electron binding energy  $E_B$ , the dependence of the emitted photoelectron  $E_k$  with the incident X-ray energy (photon) as is given by Einstein's photoelectric law

$$E_k = h\nu - E_B \quad (3)$$

here  $h\nu$  is the photon energy, while for simplicity the contribution of the work function was omitted in equation (3).

By combining equations (2) and (3) we find:

$$\lambda = c (h\nu - E_B)^x \quad (4)$$

since the  $E_B$  is characteristic of the atomic core levels and independent of the excitation photon energy, is evident from equation (4) that by increasing the photon energy,  $\lambda$  values and consequently the analysis depth  $d$  are also increased.

## References

1. Tanuma, S.; Powell, C.J.; Penn, D.R. Calculations of Electron Inelastic Mean Free Paths. V. Data for 14 Organic Compounds over the 50–2000 EV Range. *Surf. Interface Anal.* **1994**, *21*, 165–176, doi:10.1002/SIA.740210302.
2. D. Briggs (Editor), M.P.S. (Editor) *Practical Surface Analysis; Volume 1, Auger and X-Ray Photoelectron Spectroscopy*; Wiley, 1996; Vol. 1; ISBN 0471953407.
